# Supplementary material for: Soot oxidation performance with a HZSM-5 supported Ag nanoparticles catalyst and the characterization of Ag species
Source: Royal Society of Chemistry journal article supplement (doi:10.1039/c7ra06712g), 2017-01-01
Supplement: c7ra06712g1.pdf [file c7ra06712g1.pdf]

## Supporting Information

# Soot oxidation performance with HZSM-5 supported Ag nanoparticles catalyst and the characterization of Ag species

*Hongcheng Ruan<sup>1)</sup>, Maiko Nishibori<sup>1)\*</sup>, Tomoki Uchiyama<sup>2)</sup>, Kakeru Ninomiya<sup>1)</sup>, Kazutaka Kamitani<sup>3)</sup>, Kazuo Kato<sup>2)</sup>, Yuko Konishi<sup>3)</sup>, Alexander Haensch<sup>4)</sup>, Nicolae Barsan<sup>4)</sup>, Udo Weimar<sup>4)</sup> and Kengo Shimano<sup>1)</sup>*

1) Department of Molecular and Material Sciences, Interdisciplinary Graduate School of Engineering Sciences, Kyushu University, Kasuga, Fukuoka, 816-8580, Japan

2) Japan Synchrotron radiation Research Institute, SPring-8, Sayo, Hyogo, 679-5198, Japan

3) Institute for Materials Chemistry and Engineering, Kyushu University, Motoooka, Nishi-ku, Fukuoka 819-0395, Japan

4) Institute of Physical Chemistry, University of Tuebingen, Tuebingen D-72076, Germany

## List of Figures and Tables

**Fig. S1.** SEM image (a) and DRIFTS (b) of carbon black at room temperature.

**Fig. S2.** EDS mapping of different elements of Ag/HZSM-5.

**Fig. S3.** Schematic of Diffuse Reflectance Infrared Fourier Transform spectroscopy (DRIFTS).

**Fig. S4.** DRIFTS spectra of HZSM-5 (red line) and Ag/HZSM-5 (green line) at room temperature.

**Fig. S5.** TG-DTA curves of the soot combustion with x Ag/HZSM-5 catalysts in TC and LC modes, respectively, 2% (a), 4.5% (b) and 8% (c).

**Fig. S6.** In-situ DRIFTS spectra of soot oxidation with 4.5% Ag/HZSM-5 with increasing temperature. All the spectra were divided by the spectrum measured at 149 °C.

**Fig. S7.** STEM images and size distribution of Ag particles of Ag/HZSM-5 after high temperature (800 °C) treatment.

**Fig. S8.** In-situ Ag K-edge absorption XANES spectra after normalization for M-TC (a) and M-LC (b) from 25 °C to 250 °C.

**Table S1.** Infrared parameters of various modes of HZSM-5.

**Table S2.** Catalytic performances for soot combustion with catalysts x Ag/HZSM-5 for M-TC and M-LC.

**Table S3.** Catalytic performance for soot oxidation with various catalysts published already.

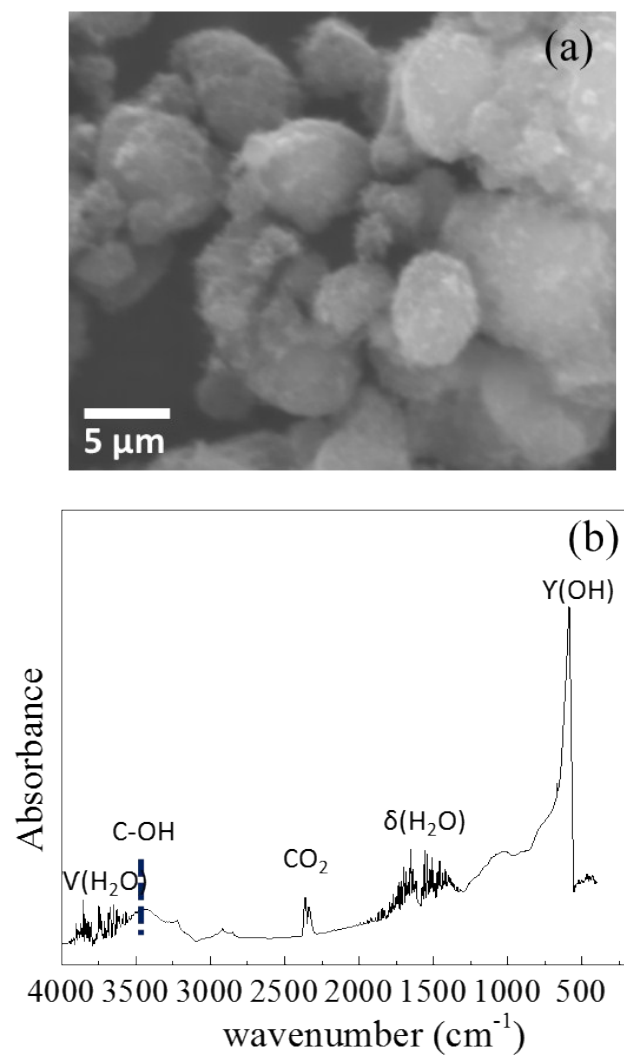

**Fig. S1.** SEM image (a) and DRIFTs (b) of carbon black at room temperature.

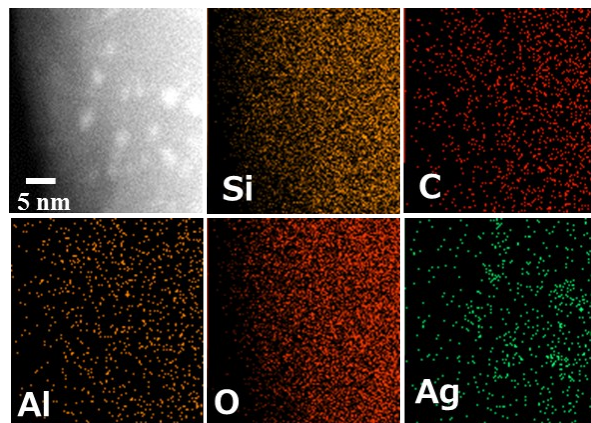

**Fig. S2.** EDS mapping of different elements of Ag/HZSM-5.

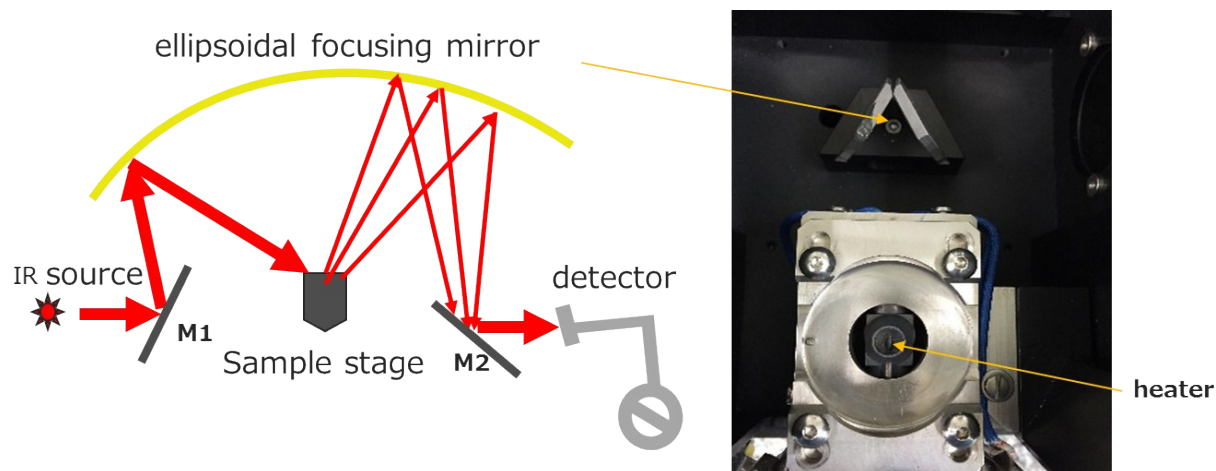

**Fig. S3.** Schematic of Diffuse Reflectance Infrared Fourier Transform spectroscopy (DRIFTs).

Diffuse Reflectance Infrared Fourier Transform spectroscopy (DRIFTs) measurements were performed on an EQUINOX 55 (Bruker, Germany) equipped with a liquid nitrogen cooled MCT detector.  $N_2$  (99.99% purity) is used as chamber blowing gas at a rate of 100 ml/min. Ex-situ DRIFTs spectra were collected at 25 °C in the flowing  $N_2$ , the samples were kept in the flowing  $N_2$  for 30 min as a pretreatment at 25 °C. In-situ DRIFTs spectra were collected from 150 to 375 °C with an interval of 1 °C in a sub-chamber with flowing synthetic air (100 ml/min), the temperature was increased at the rate of 1 °C /min and kept at 375 °C for 2 h. The samples were conducted in the synthetic air at 50 °C for 2 h as a pretreatment before measuring. All of the spectra, determined at a resolution of 4  $cm^{-1}$ , were analyzed by OPUS (Bruker, Germany) software.

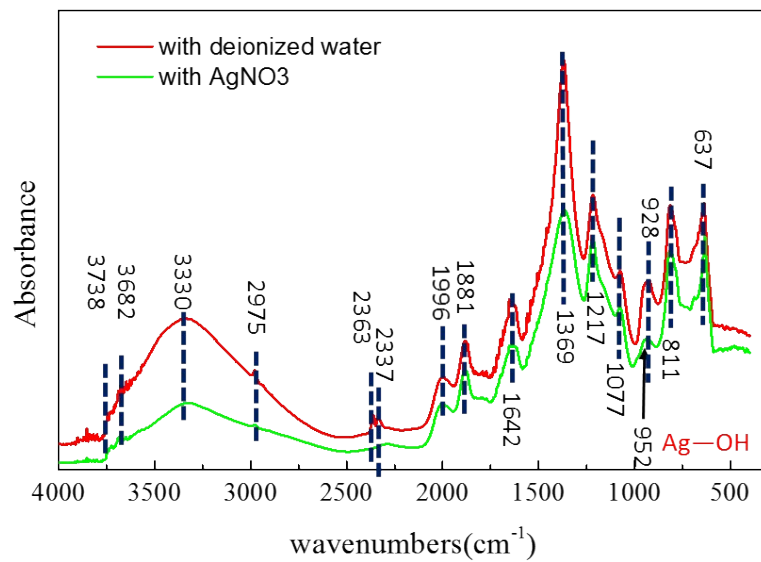

**Fig. S4.** DRIFTS spectra of HZSM-5 (red line) and Ag /HZSM-5 (green line) at room temperature.

**Table S1.** Infrared parameters of various modes of HZSM-5.

| HSZ891HOA(Si/Al= 1500)          |                                                           |
|---------------------------------|-----------------------------------------------------------|
| Wavenumbers (cm <sup>-1</sup> ) | Modes <sup>1-5</sup>                                      |
| 3738                            | Si-OH located at the external surface                     |
| 3682                            | $\gamma(\text{OH})$                                       |
| 3330                            | H-bonded OH group                                         |
| 2975                            | $\nu(\text{CH})$                                          |
| 1996, 1881                      | lattice vibrations                                        |
| 1642                            | $\delta(\text{HOH})$                                      |
| 1369                            | $\delta(\text{OH})$                                       |
| 1217, 811                       | External linkages between tetrahedral                     |
| 1077                            | Internal vibrations of $[\text{Si}, \text{Al}]\text{O}_4$ |

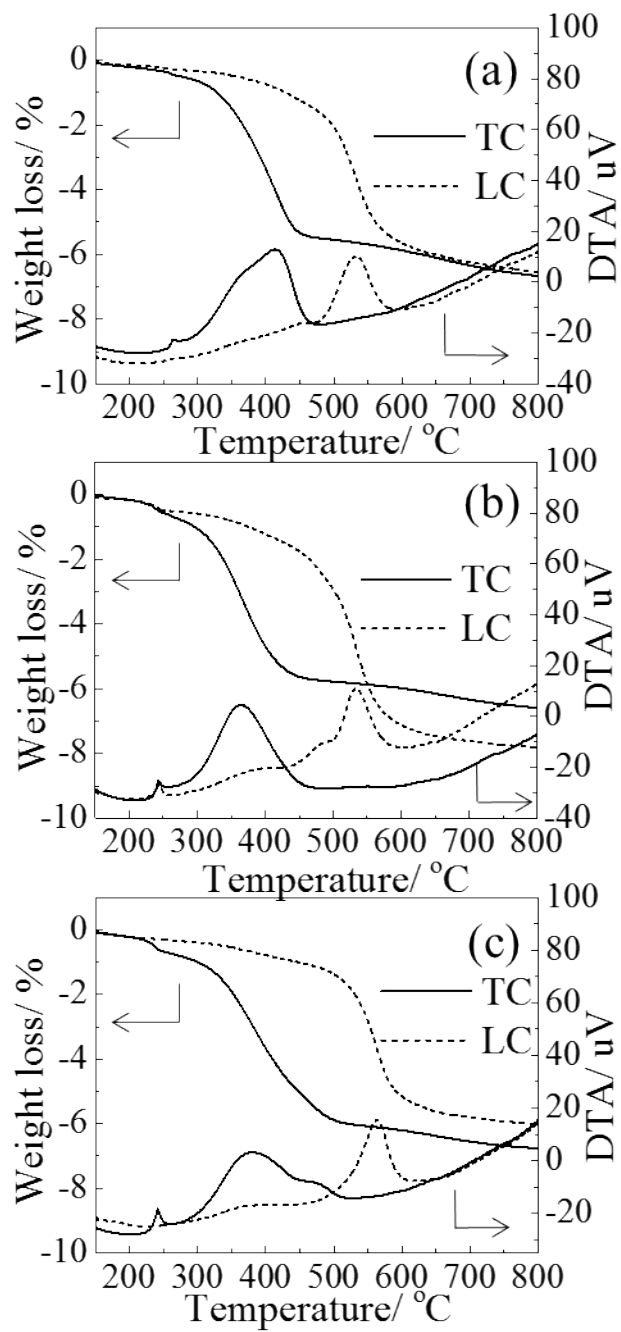

**Fig. S5.** TG-DTA curves of the soot combustion with x Ag/HZSM-5 catalysts in TC and LC modes, (a) 2%, (b) 4.5% and (c) 8%.



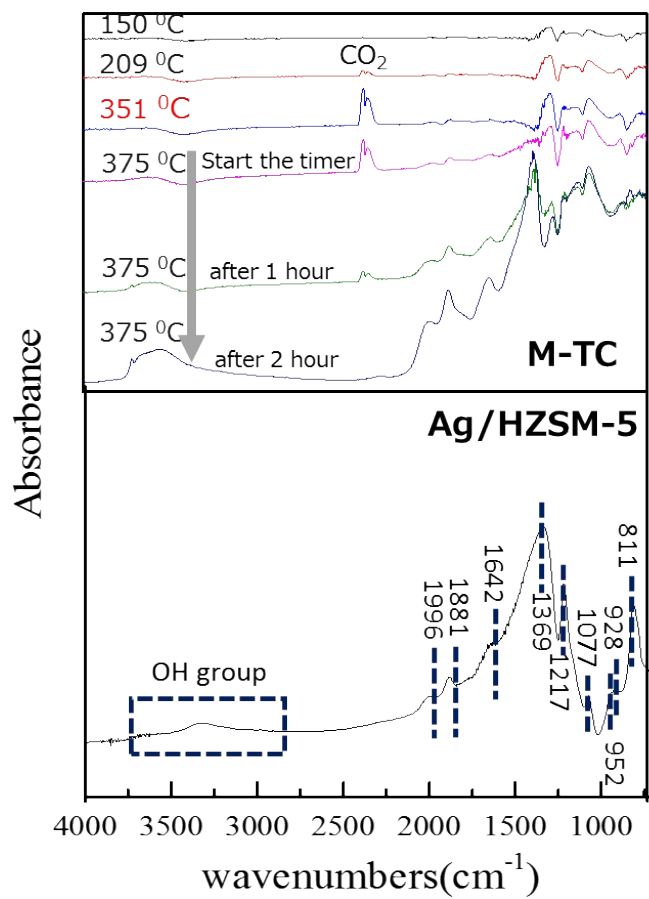

**Fig. S6.** In-situ DRIFTS spectra of soot oxidation with 4.5% Ag/HZSM-5 with increasing temperature. All the spectra were divided by the spectrum measured at 149 °C.

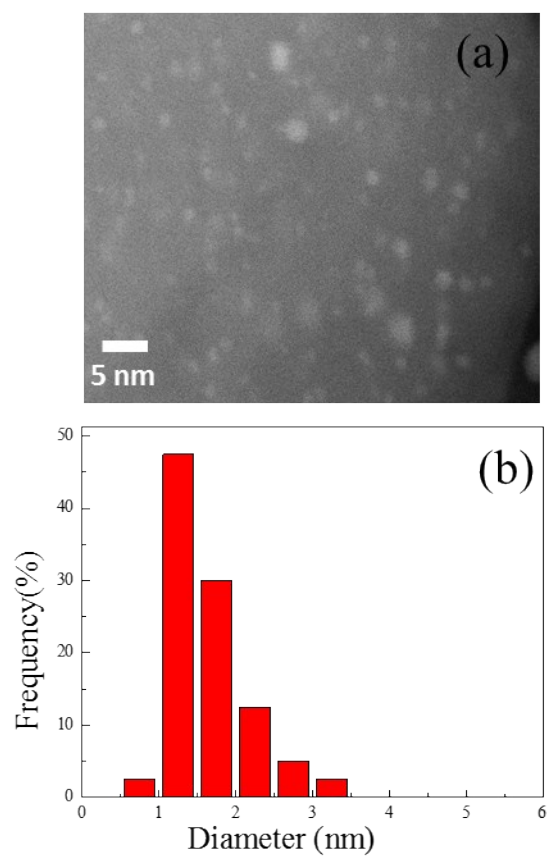

**Fig. S7.** STEM images and size distribution of Ag particles of Ag/HZSM-5 after high temperature (800 °C) treatment.

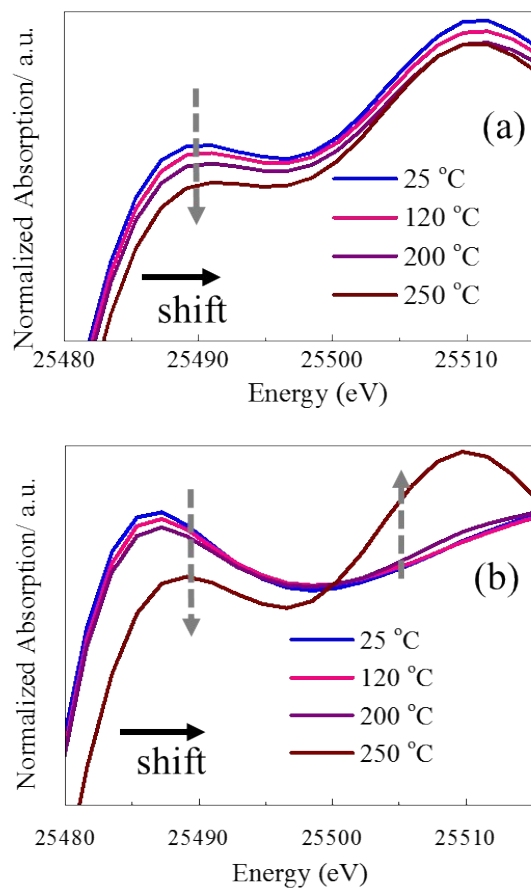

**Fig. 8.** In-situ Ag K-edge absorption XANES spectra after normalization for M-TC (a) and M-LC (b) from 25 °C to 250 °C.

**Table S2.** Catalytic performances for soot combustion with catalysts x Ag /HZSM-5 for M-TC and M-LC.

| Catalysts<br>xAg/HZSM-5 <sup>a</sup> | CB oxidation performance (°C) <sup>b</sup> |                  |                 |                  |
|--------------------------------------|--------------------------------------------|------------------|-----------------|------------------|
|                                      | M-TC                                       |                  | M-LC            |                  |
|                                      | T <sub>ig</sub>                            | T <sub>max</sub> | T <sub>ig</sub> | T <sub>max</sub> |
| 2%                                   | 308                                        | 414              | 357             | 534              |
| 4.5%                                 | 300                                        | 366              | 339             | 533              |
| 8%                                   | 307                                        | 379              | 347             | 563              |

<sup>a</sup> x is the weight percentage of silver in catalyst Ag/HZSM-5;

<sup>b</sup> Definition of T<sub>ig</sub> (ignition temperature of soot combustion) and T<sub>max</sub> (peak temperature of DTA curves);

**Table S3.** Catalytic performance for soot oxidation with various catalysts published already.

| Catalysts                                                                                                    | Experimental method                                                                                  | T <sub>so</sub> (°C)                                                                                                                              | comments                                                            | Ref.         |
|--------------------------------------------------------------------------------------------------------------|------------------------------------------------------------------------------------------------------|---------------------------------------------------------------------------------------------------------------------------------------------------|---------------------------------------------------------------------|--------------|
| Ag/CeO <sub>2</sub> , Ag/ZrO <sub>2</sub> ,<br>Ag/Al <sub>2</sub> O <sub>3</sub><br>(1-10 wt%)               | IW impregnation,<br>Cal. 500 °C for 3 h                                                              | 334–345 °C (T <sub>50</sub> in TC mode) <sup>a</sup> ,<br>460–436 °C (T <sub>50</sub> in LC mode),                                                | Soot /cata.=1 : 20,<br>T <sub>50</sub> (50% of weight loss)         | 6            |
| Cu/Mn–Ce mixed oxides                                                                                        | sol–gel method<br>Cal. 500 °C for 3 h                                                                | 356–390 °C (T <sub>max</sub> in TC mode) <sup>b</sup> ,<br>503–553 °C (T <sub>max</sub> in LC mode),                                              | Soot /cata.=1 : 10,<br>T <sub>m</sub> (max oxidation rate temp.)    | 7            |
| Pt/MO <sub>x</sub> (MO <sub>x</sub> = TiO <sub>2</sub> , ZrO <sub>2</sub> , Al <sub>2</sub> O <sub>3</sub> ) | IW impregnation,<br>Cal. 400-600 °C for 3 h.                                                         | 410–540 °C (T <sub>50</sub> ) <sup>b</sup> ,                                                                                                      | Soot /cata.=1 : 20,<br>T <sub>50</sub> (50% of weight loss)         | 8            |
| Ag-loaded sepiolite–Zr–K–O                                                                                   | IW impregnation,<br>Cal. 600 °C for 1 h.                                                             | 490 °C (T <sub>50</sub> in TC mode) <sup>a</sup> ,                                                                                                | Soot /cata.=1 : 5,<br>T <sub>50</sub> (peak temp. of DTA curve)     | 9            |
| Ag(1-15 wt%)/perovskite                                                                                      | impregnation,<br>Cal. 500 °C for 4 h.                                                                | 398–493 °C (T <sub>50</sub> ) <sup>b</sup> ,                                                                                                      | Soot /cata.=1 : 10<br>T <sub>50</sub> (50% conversion rate of soot) | 10           |
| ZSM5, PtZSM5, PtAl perovskite                                                                                | IW impregnation,<br>Cal. 500-585 °C for 2 h<br><br>Electrospinning technique,<br>Cal. 800 °C for 6 h | 440–563 °C (T <sub>50</sub> ) <sup>b</sup> ,<br><br>490–505 °C (T <sub>max, L</sub> ),<br>585–597 °C (T <sub>max, H</sub> ), LC mode <sup>a</sup> | Soot /cata.=1 : 10<br><br>Soot /cata.=1 : 19                        | 11<br><br>12 |
| Co, K and/or Ba supported on MgO, La <sub>2</sub> O <sub>3</sub> and CeO <sub>2</sub>                        | impregnation,<br>Cal. 400 °C and 700 °C for 4 h                                                      | 350–400 °C (T <sub>max</sub> ) <sup>b</sup>                                                                                                       | Soot /cata.=1 : 20,                                                 | 13           |
| Ag–CeO <sub>2</sub>                                                                                          | Co-precipitation method,<br>Cal. 500 °C for 5 h.                                                     | 315–480 °C (T <sub>max</sub> in TC mode),<br>376–596 °C (T <sub>max</sub> in LC mode) <sup>b</sup> ,                                              | Soot /cata.=1 : 19,                                                 | 14           |
| Ag/HZSM-5                                                                                                    | impregnation,<br>Cal. 500 °C for 5 h                                                                 | 366 °C (T <sub>max</sub> in TC mode),<br>533 °C (T <sub>max</sub> in LC mode) <sup>a</sup> ,                                                      | Soot /cata.=1 : 19                                                  | this work    |

|                                                                                                               |                                                    |                                                                                                                                                                                                 |                                                                                                                                                                     |    |
|---------------------------------------------------------------------------------------------------------------|----------------------------------------------------|-------------------------------------------------------------------------------------------------------------------------------------------------------------------------------------------------|---------------------------------------------------------------------------------------------------------------------------------------------------------------------|----|
| MnO <sub>x</sub> -CeO <sub>2</sub>                                                                            | Citric acid complex method.<br>Cal. 550 °C for 5 h | 299–387 °C<br>(T <sub>CO<sub>2</sub>, max</sub> in LC mode) <sup>a</sup>                                                                                                                        | Soot /cata.=1 : 9,<br>Two types O-vacancies favored to the migration and transformation of active species                                                           | 15 |
| Manganese oxide<br>(MnO <sub>2</sub> , Mn <sub>2</sub> O <sub>3</sub><br>and Mn <sub>3</sub> O <sub>4</sub> ) | Commercially obtained or FSP method                | 305–390 °C<br>(T <sub>CO<sub>2</sub>, max</sub> in LC mode) <sup>a</sup>                                                                                                                        | A strong contribution of bulk oxygen (ca. 60%) occurred for tight as well as loose contact.                                                                         | 16 |
| MnCeO                                                                                                         | Hydrothermal method,<br>impregnation method        | MnO <sub>x</sub> /CeO <sub>2</sub> nanorod<br>317 °C (T <sub>50</sub> in TC mode) <sup>a</sup>                                                                                                  | MnO <sub>x</sub> /CeO <sub>2</sub> nanorods exhibits better catalytic activity due to its larger surface area and higher oxygen release rate                        | 17 |
| Ag/Ce <sub>x</sub> Nd <sub>1-x</sub> O <sub>2</sub>                                                           | Hydrothermal method,                               | 394–458 °C<br>(T <sub>CO<sub>2</sub>, max</sub> in LC mode) <sup>a</sup>                                                                                                                        | Soot /cata.=1 : 10,<br>Introduction of Nd can lower soot oxidation activity but improve the catalysts' thermal stability effectively                                | 18 |
| Co-CeO <sub>2</sub>                                                                                           | Sol-gel method.                                    | 335 °C<br>(without H <sub>2</sub> O, T <sub>CO<sub>2</sub>, max</sub> in TC mode) <sup>a</sup> ,<br>310 °C<br>(with H <sub>2</sub> O, T <sub>CO<sub>2</sub>, max</sub> in TC mode) <sup>a</sup> | Co in Co-Ce-O <sub>x</sub> can improve its catalytic activity for NO oxidation.<br>Ce in Co-Ce-O <sub>x</sub> can promote its capacity for NO <sub>2</sub> storage. | 19 |

<sup>a</sup> Temperature of soot oxidation measured by temperature programmed combustion; <sup>b</sup> Temperature of soot oxidation measured by thermogravimetric methods.

## References

- (1) F. Wakabayashi, *J. Phys. Chem.*, 1996, **100**, 1442-1444.
- (2) I. O. Ali, M. S. Thabet, K. S. El-Nasser, A. M. Hassan, T. M. Salama, *Microporous Mesoporous Mater.*, 2012, **160**, 97–105.
- (3) K. Hadjiivanov, J. Saussey, J. L. Freysz, J. C. Lavalley, *Catal. Lett.*, 1998, **52**, 103–108.
- (4) M. Mhamdi, S. Khaddar-Zine, A. Ghorbel, *Appl. Catal., A*, 2009, **357**, 42–50.
- (5) A. Kudasheva, S. Sorribas, B. Zornoza, C. Téllez, J. Coronas, *J. Chem. Technol. Biotechnol.*, 2015, **90**, 669–677.
- (6) E. Aneghi, J. Llorca, C. D. Leitenburg, G. Dolcetti, A. Trovarelli, *Appl. Catal. B*, 2009, **91**, 489–498.
- (7) Q. Liang, X. D. Wu, D. Weng, H. B. Xu, *Catal. Today*, 2008, **139**, 113–118.
- (8) J. Oi-Uchisawa, A. Obuchi, R. Enomoto, J. Y. Xu, T. Nanba, S. T. Liu, S. Kushiyama, *Appl. Catal., B* 2001, **32**, 257–268.
- (9) N. Güngör, S. Işçi, E. Günister, W. Miśta, H. Teterycz, R. Klimkiewicz, *Appl. Clay Sci.*, 2006, **32**, 291–296.
- (10) Z. M. Liu, Z. P. Hao, H. P. Zhang, Y. H. Zhuang, *J. Chem. Technol. Biotechnol.*, 2002, **77**, 800–804.
- (11) S. Liu, X. D. Wu, D. Weng, M. Li, R. Ran, *ACS Catal.*, 2015, **5**, 909–919.
- (12) C. Lee, Y. Jeon, S. Hata, J. Park, R. Akiyoshi, H. Saito, Y. Teraoka, Y. J. Shul, H. Einaga, *Appl. Catal., B*, 2016, **191**, 157–164.

- (13) M. L. Pisarello, V. Milt, M. A. Peralta, C. A. Querini, E. E. Miró, *Catal. Today*, 2002, **75**, 465–470.
- (14) K. Yamazaki, T. Kayama, F. Dong, H. Shinjoh, *J. Catal.*, 2011, **282**, 289–298.
- (15) X. T. Lin, S. J. Li, H. He, Z. Wu, J. L. Wu, L. M. Chen, D. Q. Ye, M. J. Fu, *Appl. Catal., B*, **2017**, *in press*.
- (16) S. Wagloehner, M. Nitzer-Noski, S. Kureti, *Chem. Eng. J.* 2015, **259**, 492–504.
- (17) K. Mori, Y. Miyauchi, Y. Kuwahara, H. Yamashita, *Bull. Chem. Soc. Jpn.*, 2017, **90**, 556–564.
- (18) Y. X. Gao, A. Q. Duan, S. Liu, X. D. Wu, W. Liu, M. Li, S. G. Chen, X. Wang, D. Weng, *Appl. Catal., B*, 2017, **203**, 116–126.
- (19) J. N. Xu, G. Z. Lu, Y. Guo, Y. L. Guo, X. Q. Gong, *Appl. Catal., A* 2017, **535**, 1-8.
